# Supplementary material for: Akkermansia muciniphila Cell-Free Supernatant Improves Glucose and Lipid Metabolisms in Caenorhabditis elegans
Source: MDPI journal article supplement (doi:10.3390/nu15071725), 2023-03-31
Supplement: s1 [file s1]

**Table S1.** Primer sequences for qRT-PCR.

| <b>Genes</b>   | <b>Forward sequences (5'-3')</b> | <b>Reverse sequences (5'-3')</b> |
|----------------|----------------------------------|----------------------------------|
| <i>β-actin</i> | GCCGGAGACGACGCTCCACGCG           | GCCTCGTCTCCGACGTACGAGTC          |
| <i>gsy-1</i>   | ATCCTCGGATTCATGGTCGC             | GCTCCACCAGCACACAAATG             |
| <i>pygl-1</i>  | CCTCATCGTCGAGTCCGAAG             | GTAGTAGTCGCGATCGGTGG             |
| <i>pfk-1.1</i> | TATGGTCCGTGTGCCACTTC             | TCTCTGGAAACTGCGTCCAC             |
| <i>pyk-1</i>   | TCAGGTACAAGACGTCGAGC             | CCAGCATGCTCCTCTTCGAT             |
| <i>acs-2</i>   | GCAGCCTCGCTCTACACTCT             | GACTCCTGCAAATGCACATGC            |
| <i>sbp-1</i>   | CACCACCTCATCACCACCATCAC          | TTCGTCTCTGGAGCATCTTCAATCG        |
| <i>cpt-4</i>   | TGACAATCGCACCTCCACAG             | TGAATGCTTCGTCCCTCGTT             |
| <i>tph-1</i>   | CGGTGAGCCAATTCCGCGAA             | AGAACTGCTTGCATGCGTGC             |
| <i>ech-1.1</i> | CGTCGGAGCTGGATTTCATGG            | TCGTTCAACGCCTGCCTGGT             |
| <i>fat-5</i>   | CGGCCGCCCTCTTCCGTTAC             | TGGCTGCCATCCGACCCAGT             |
| <i>fat-6</i>   | TCAACAGCGCTGCTCACTAT             | TTCGACTGGGGTAATTGAGG             |
| <i>fat-7</i>   | CAACAGCGCTGCTCACTATT             | CACCAACGGCTACAACTGTG             |
